# Supplementary material for: Design of Experiments, Chemometrics, and Raman Spectroscopy for the Quantification of Hydroxylammonium, Nitrate, and Nitric Acid
Source: PubMed Central journal article supplement — ACS Omega. 2022 Feb 15;7(8):7287–96. doi: 10.1021/acsomega.1c07111 (PMC8892473; doi:10.1021/acsomega.1c07111), 2022-02-15
Supplement: ao1c07111_si_001.pdf [file ao1c07111_si_001.pdf]

# Design of experiments, chemometrics, and Raman spectroscopy for the quantification of hydroxylammonium, nitrate, and nitric acid

*Luke R. Sadergaski<sup>1,\*</sup>, Travis J. Hager<sup>2</sup>, Hunter B. Andrews<sup>1</sup>*

<sup>1</sup>Oak Ridge National Laboratory, 1 Bethel Valley Rd., Oak Ridge, TN, 37830, USA

<sup>2</sup>University of Missouri, Department of Chemistry, 125 Chemistry Building Columbia, MO, 65211, USA

\*sadergaskilr@ornl.gov

## **This Supporting Information Contains:**

This manuscript has been authored by UT-Battelle, LLC, under contract DE-AC05-00OR22725 with the US Department of Energy (DOE). The US government retains and the publisher, by accepting the article for publication, acknowledges that the US government retains a nonexclusive, paid-up, irrevocable, worldwide license to publish or reproduce the published form of this manuscript, or allow others to do so, for US government purposes. DOE will provide public access to these results of federally sponsored research in accordance with the DOE Public Access Plan (<http://energy.gov/downloads/doe-public-access-plan>).

Pages: 9

Tables: 5

Figures: 7

## EXTENDED METHODS

### Tukey pair-wise statistics

The Tukey-Kramer method was used for the pairwise comparison of RMSEPs of each PLSR model assuming the null hypothesis  $H_0: \mu_i = \mu_j$ . At the level  $\alpha = 0.05$ , a type I error is made 5% of the time (i.e.,  $H_0$  is falsely rejected). When making multiple comparisons, the critical  $t$  value must be adjusted to account for  $\alpha$  inflation and avoid false significant results. Therefore, the critical  $t$  value was adjusted to avoid making a type I error.

Model comparisons were carried out using a three-step process: (1) the sample means  $\hat{y}_i$  were ranked in order from largest to smallest, (2) the largest sample mean was compared with the smallest mean until the largest was compared with the second largest, and (3) the second largest mean was compared with the smallest mean until the second largest was compared with the third largest. This pairwise comparison continued until every combination was tested.

## TABLES

**Table S1.** Solution compositions selected by D-optimal design for generating a training set to build regression models

| ID | HAN  | HNO <sub>3</sub> | Space type | Build type |
|----|------|------------------|------------|------------|
| 1  | 0.43 | 0.0              | Edge       | Model      |

|   |       |       |          |       |
|---|-------|-------|----------|-------|
| 2 | 0.0   | 0.85  | Edge     | Model |
| 3 | 0.315 | 1.0   | Edge     | Model |
| 4 | 0.50  | 0.645 | Interior | Model |
| 5 | 0.0   | 0.0   | Vertex   | Model |
| 6 | 0.215 | 0.425 | Interior | Model |

**Table S2.** D-optimal validation set comprising lack-of-fit points

| <b>ID</b> | <b>HAN</b> | <b>HNO<sub>3</sub></b> | <b>Space type</b> | <b>Build type</b> |
|-----------|------------|------------------------|-------------------|-------------------|
| 1         | 0.085      | 0.40                   | Interior          | Lack of fit       |
| 2         | 0.265      | 1.0                    | Edge              | Lack of fit       |
| 3         | 0.22       | 0.255                  | Interior          | Lack of fit       |
| 4         | 0.1325     | 0.835                  | Interior          | Lack of fit       |
| 5         | 0.135      | 0.0                    | Edge              | Lack of fit       |
| 6         | 0.35       | 0.43                   | Interior          | Lack of fit       |
| 7         | 0.50       | 0.0                    | Vertex            | Lack of fit       |
| 8         | 0.0        | 0.67                   | Edge              | Lack of fit       |
| 9         | 0.345      | 0.737                  | Interior          | Lack of fit       |
| 10        | 0.50       | 0.69                   | Edge              | Lack of fit       |

**Table S3.** Order of all possible HA<sup>+</sup> comparisons based on the magnitude of the mean ( $\hat{y}_i$ ) prediction values

| Comparisons | A    | B         |
|-------------|------|-----------|
| 1           | U-S  | D-optimal |
| 2           | U-S  | U-DD      |
| 3           | U-S  | None      |
| 4           | NP   | D-optimal |
| 5           | NP   | U-DD      |
| 6           | U-DD | D-optimal |

Abbreviations: user-defined design (U-DD), user selected (U-S), and raw data (NP)

**Table S4.** Order of all possible H<sup>+</sup> comparisons based on the magnitude of the mean ( $\hat{y}_i$ ) prediction values

| Comparison # | A         | B         |
|--------------|-----------|-----------|
| 1            | U-S       | U-DD      |
| 2            | U-S       | D-optimal |
| 3            | U-S       | None      |
| 4            | NP        | U-DD      |
| 5            | NP        | D-optimal |
| 6            | D-optimal | U-DD      |

Abbreviations: user-defined design (U-DD), user selected (User), and raw data (NP)

**Table S5.** Order of all possible  $\text{NO}_3^-$  comparisons based on the magnitude of the mean ( $\hat{y}_i$ ) prediction values. Abbreviations: user-defined design (U-DD), user selected (U-S) and raw data (NP).

| Comparison # | A         | B         |
|--------------|-----------|-----------|
| 1            | U-S       | U-DD      |
| 2            | U-S       | D-optimal |
| 3            | U-S       | NP        |
| 4            | NP        | U-DD      |
| 5            | NP        | D-optimal |
| 6            | D-optimal | U-DD      |

Abbreviations: user-defined design (U-DD), user selected (U-S) and raw data (NP)

## FIGURES

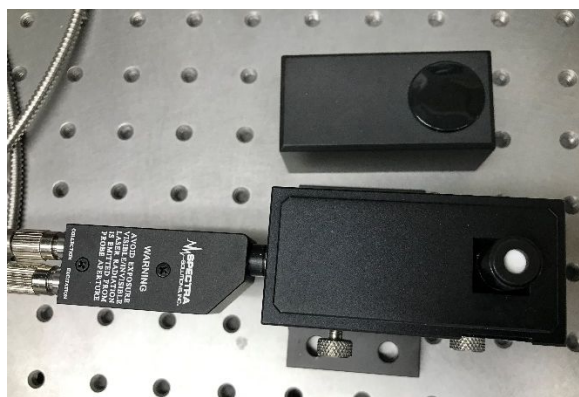

**Figure S1.** General-purpose Raman probe and probe/cuvette holder made by Spectra solutions Inc.

Photograph courtesy of Luke R. Sadergaski.

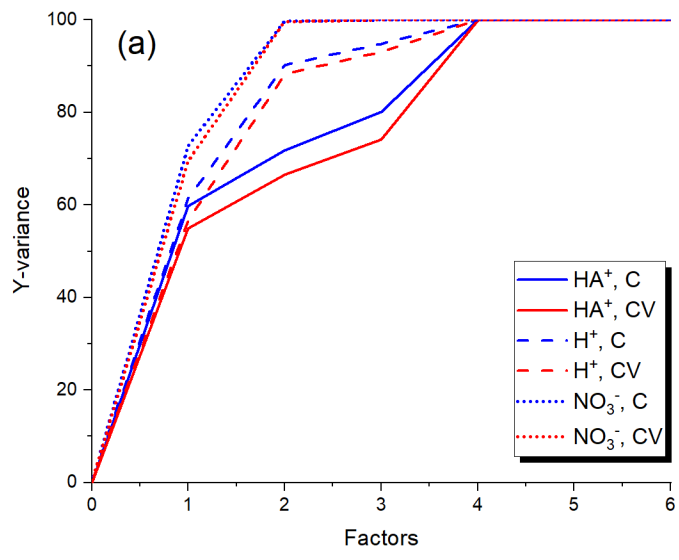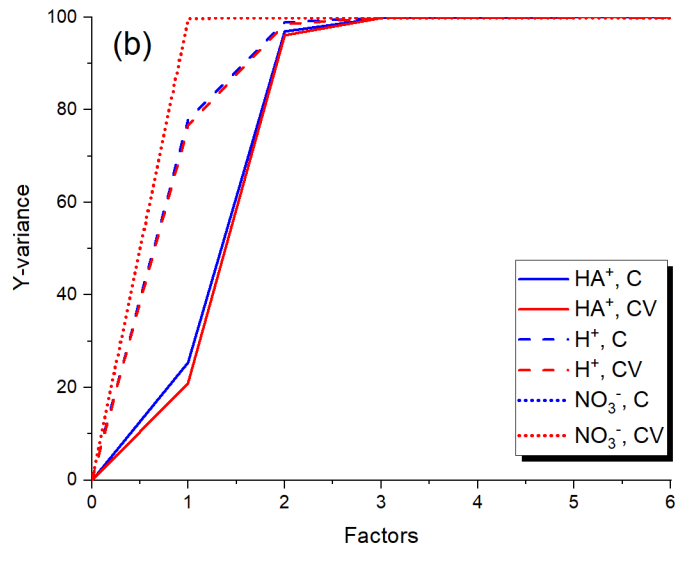

**Figure S2.** Explained  $Y$ -variance of the calibration (C) and cross validation (CV) vs. the number of factors describing hydroxylammonium ( $\text{HA}^+$ ),  $\text{H}^+$ , and  $\text{NO}_3^-$  concentrations for PLSR models built (a) without preprocessing and (b) with the optimal strategy selected using D-optimal design.

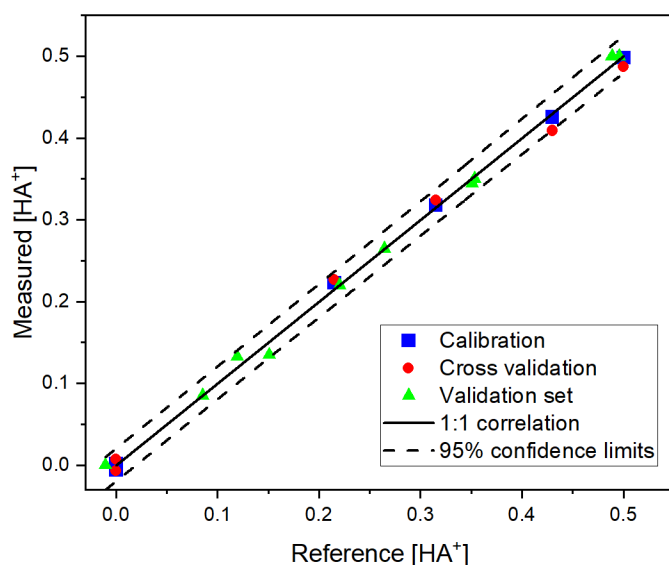

**Figure S3.** Parity plots for PLSR D-optimal model hydroxylammonium ( $\text{HA}^+$ ) results. Blue squares represent the calibration set, red circles represent the cross validation, green triangles represent the predictions on the validation set, and the line represents a notional 1:1 correlation (slope = 1) with 95% confidence limits of the linear regression between measured and reference values.



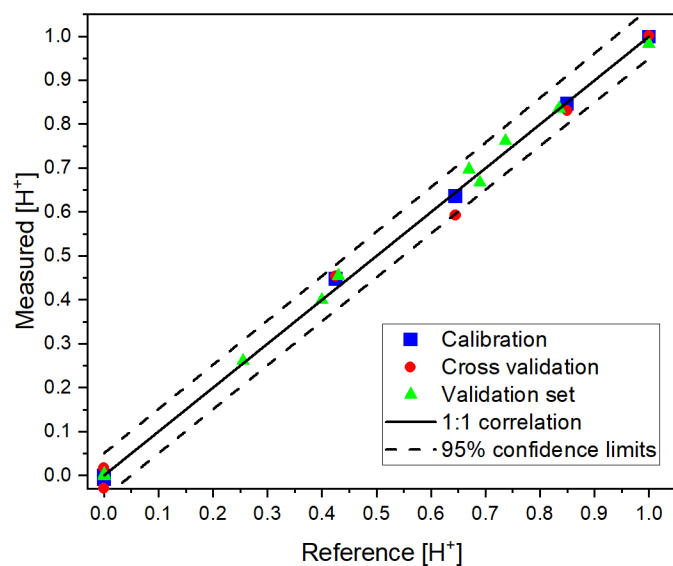

**Figure S4.** Parity plots for PLSR D-optimal model free acid (H<sup>+</sup>) results. Blue squares represent the calibration set, red circles represent the cross validation, green triangles represent the predictions on the validation set, and the line represents a notional 1:1 correlation (slope = 1) with 95% confidence limits of the linear regression between measured and reference values.

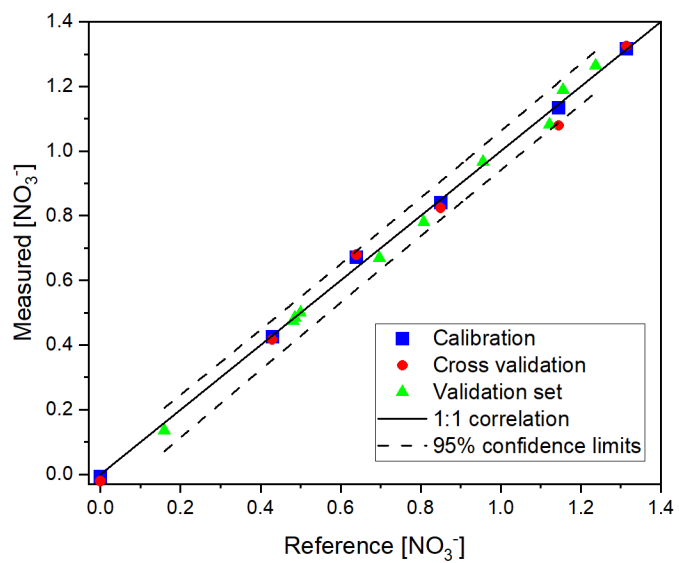

**Figure S5.** Parity plots for PLSR D-optimal model nitrate ( $\text{NO}_3^-$ ) results. Blue squares represent the calibration set, red circles represent the cross validation, green triangles represent the predictions on the validation set, and the line represents a notional 1:1 correlation (slope = 1) with 95% confidence limits of the linear regression between measured and reference values.

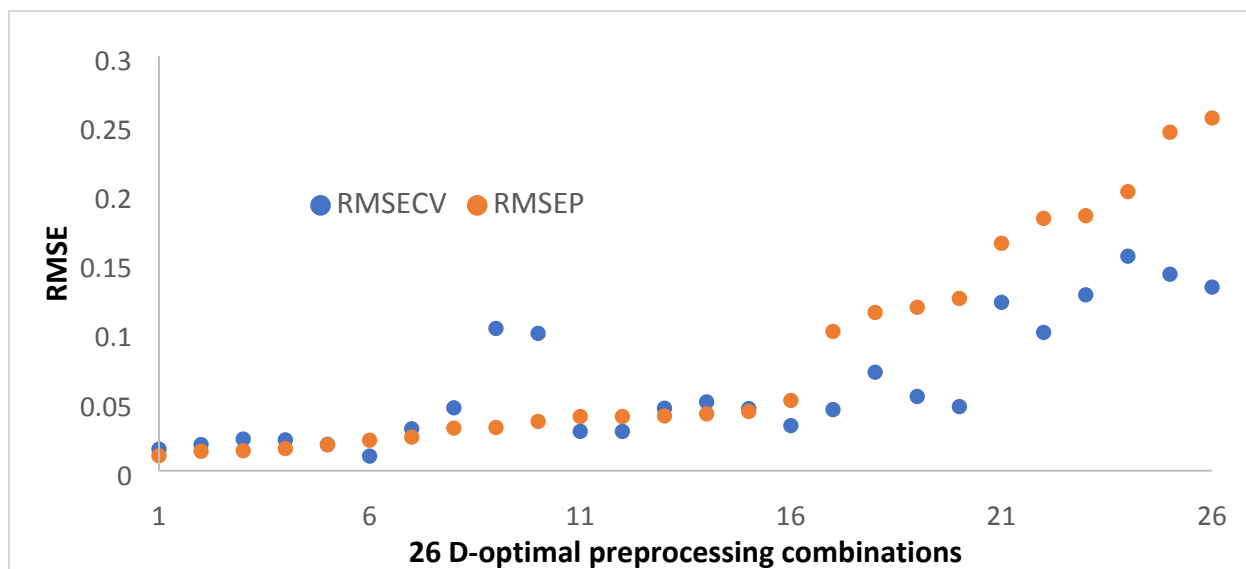

**Figure S6.** RMSECV and RMSEP for HA<sup>+</sup> concentration in order of smallest to largest RMSEP values for PLSR models built using every D-optimal preprocessing strategy.

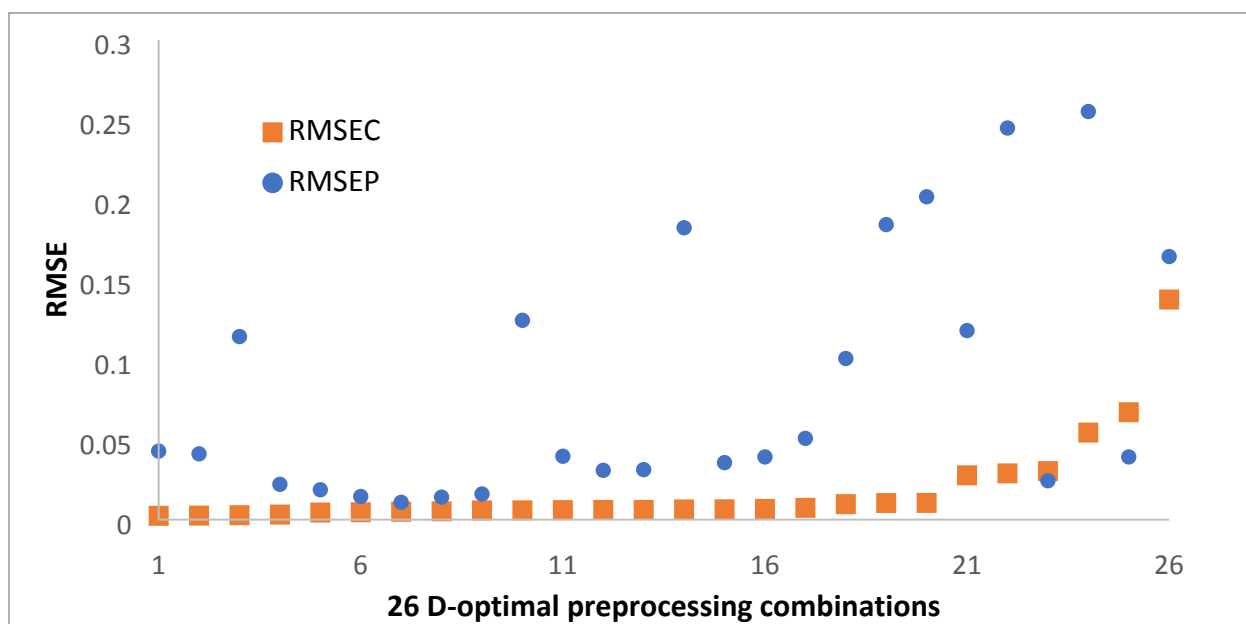

**Figure S7.** RMSEC and RMSEP for HA<sup>+</sup> concentration in order of smallest to largest RMSEC values for PLSR models built using every D-optimal preprocessing strategy.
